# Supplementary material for: Mitochondrial DNAs provide insight into trypanosome phylogeny and molecular evolution
Source: PubMed Central journal article supplement (PMC7724854; doi:10.1186/s12862-020-01701-9), 2020-12-09

*T. congolense* WG84

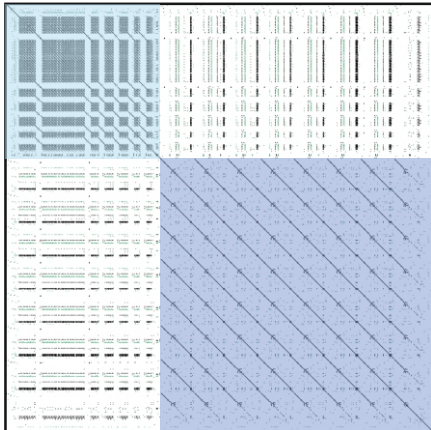

*T. congolense* IL3000

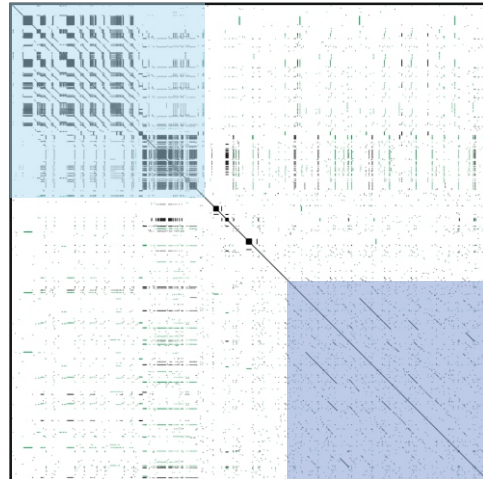

*T. congolense* GAM2

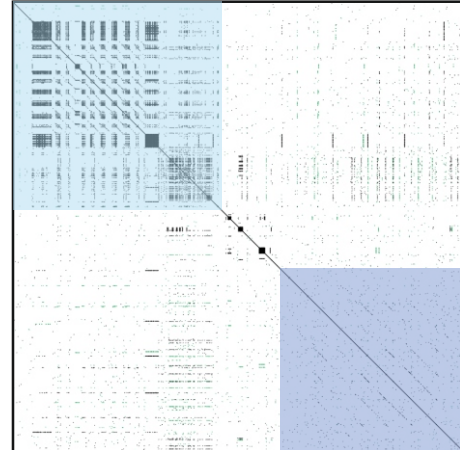

*T. vivax* MT1

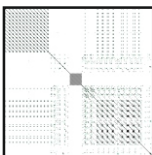

*T. vivax* Y486

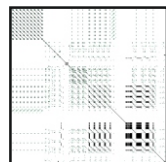

*T. simiae* ERA C2

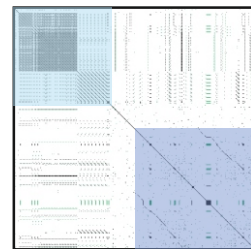

*T. brucei brucei* Lister 427

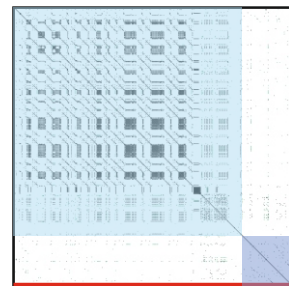

*T. godfreyi* KEN7

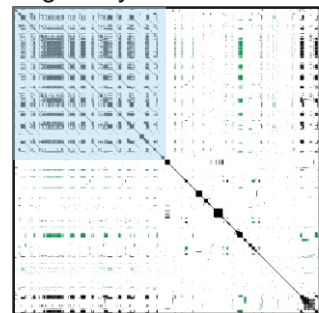

Supplement: 12862_2020_1701_MOESM3_ESM.pdf [file 12862_2020_1701_MOESM3_ESM.pdf]
