# Supplementary material for: Mitochondrial DNAs provide insight into trypanosome phylogeny and molecular evolution
Source: PubMed Central journal article supplement (PMC7724854; doi:10.1186/s12862-020-01701-9), 2020-12-09

m54053\_181105\_161246

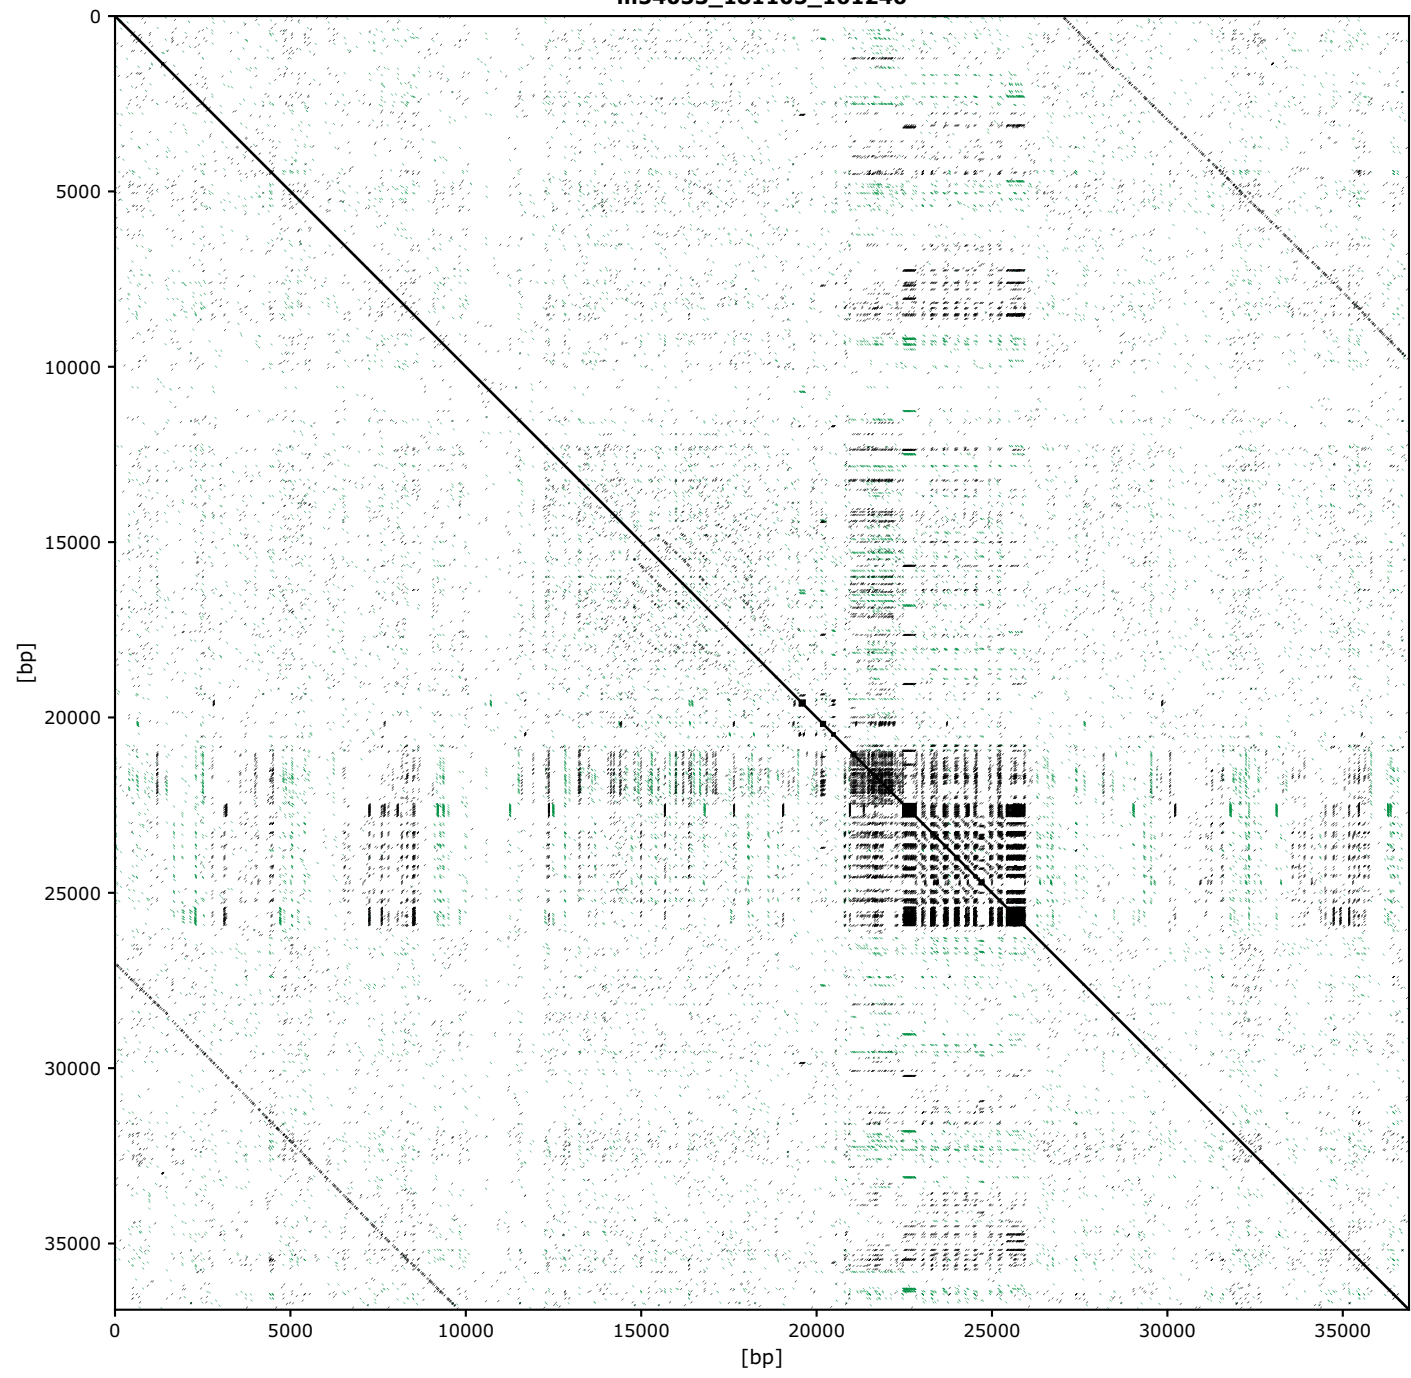

Supplement: 12862_2020_1701_MOESM4_ESM.pdf [file 12862_2020_1701_MOESM4_ESM.pdf]
