# Supplementary material for: Mitochondrial DNAs provide insight into trypanosome phylogeny and molecular evolution
Source: PubMed Central journal article supplement (PMC7724854; doi:10.1186/s12862-020-01701-9), 2020-12-09
Supplement: 12862_2020_1701_MOESM5_ESM.pdf [file 12862_2020_1701_MOESM5_ESM.pdf]

|  |             |               |
|--|-------------|---------------|
|  | Tv Tv3638   | Côte d'Ivoire |
|  | Tv Tv3658   | Côte d'Ivoire |
|  | Tv Tv2005   | Uganda        |
|  | Tv Tv3651   | Côte d'Ivoire |
|  | Tv MT1      | Venezuela     |
|  | Tv Liem 176 | Venezuela     |
|  | Tv Tv3171   | Gambia        |
|  | Tv Tv2714   | Uganda        |
|  | Tv Tv2323   | Uganda        |
|  | Tv Y486     | Nigeria       |
|  | Tv Tv319    | Nigeria       |
